# Supplementary material for: Template-free ultraspray pyrolysis synthesis of N/Fe-doped carbon microspheres for oxygen reduction electrocatalysis
Source: Royal Society of Chemistry journal article supplement (doi:10.1039/c5ta02570b), 2015-01-01
Supplement: c5ta02570b1.pdf [file c5ta02570b1.pdf]

**Supporting Information for**  
**Template-free ultraspray pyrolysis synthesis of N/Fe-doped carbon microspheres for**  
**oxygen reduction electrocatalysis**

*Stefania Marzorati,<sup>a</sup> Joana M. Vasconcelos,<sup>b</sup> Jiwen Ding,<sup>b</sup> Mariangela Longhi,<sup>a</sup> and  
Paula E. Colavita<sup>b,\*</sup>*

a – Università degli Studi di Milano, Dipartimento di Chimica, Via Golgi 19, 20133

Milano, Italy

b – School of Chemistry and Centre for Research on Adaptive Nanostructures and  
Nanodevices (CRANN), Trinity College Dublin, Dublin 2, Ireland

---

\* Tel: +353 1 8963562; Email: [colavitp@tcd.ie](mailto:colavitp@tcd.ie).

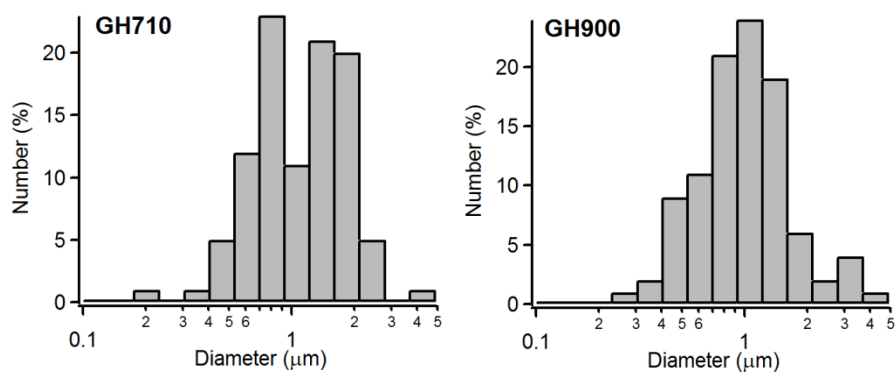

**Figure S11:** Particle size distributions obtained from SEM images for GH710 and GH900 microspheres.

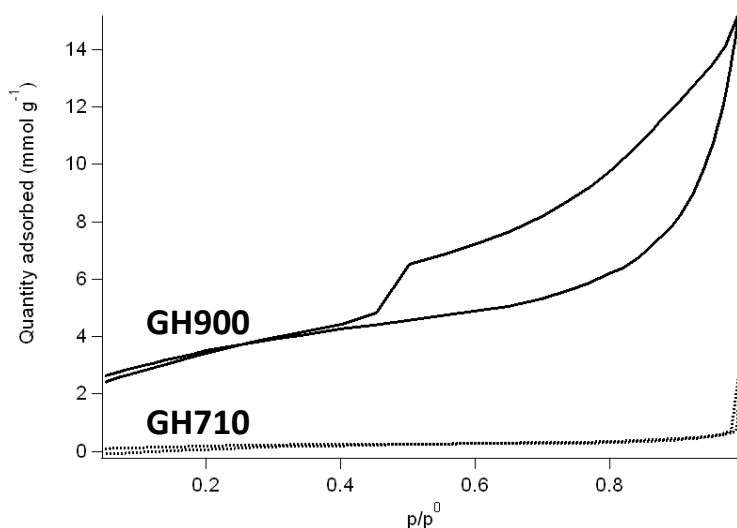

**Figure S12:** N<sub>2</sub> adsorption/desorption isotherms at 77 K for GH710 and GH900 microspheres.

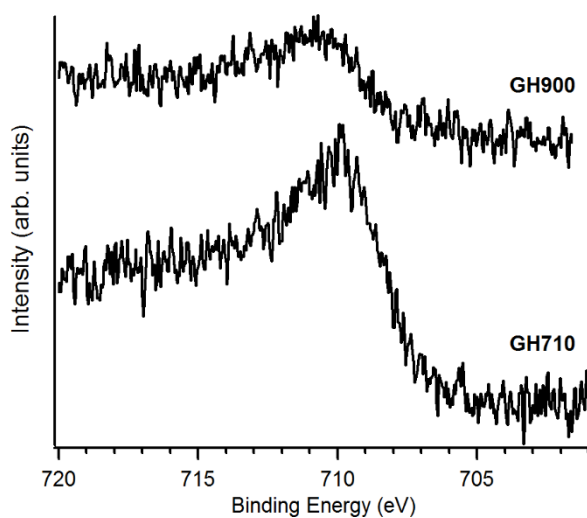

**Figure S13:** XPS spectra of the Fe 2p<sub>3/2</sub> peak of GH710 and GH900 microspheres.
